# Supplementary material for: Autocatalytic photodegradation of [Ru(ii)(2,2′-bipyridine)2DAD]+(DADH = 1,2-dihydroxyanthracene-9,10-dione) by hydrogen peroxide under acidic aqueous conditions
Source: Royal Society of Chemistry journal article supplement (doi:10.1039/d1dt00952d), 2021-01-01
Supplement: d1dt00952d1.pdf [file d1dt00952d1.pdf]

## Supporting Information

### Autocatalytic Photodegradation of $[\text{Ru}(\text{II})(2,2'\text{-bipyridine})_2\text{DAD}]^+$ (**DADH** = 1,2-dihydroxyanthracene-9,10-dione) by Hydrogen Peroxide under Acidic Aqueous Conditions

Lingli Zeng, Dumitru Sirbu, Nikolai Tkachenko and Andrew C. Benniston

#### Table of Contents

|                                                                                                                                                                                                                                                                                          |    |
|------------------------------------------------------------------------------------------------------------------------------------------------------------------------------------------------------------------------------------------------------------------------------------------|----|
| <b>Table S1.</b> $^1\text{H}$ NMR chemical shifts (ppm) for $\Delta$ - <b>RDAD</b> in $\text{CD}_3\text{CN}$ at R.T. ....                                                                                                                                                                | 2  |
| <b>Figure S1.</b> Labelled HSQC spectrum for $\Delta$ - <b>RDAD</b> in $\text{CD}_3\text{CN}$ at R.T. ....                                                                                                                                                                               | 3  |
| <b>Figure S2.</b> Observed and theoretical mass spectra for <b>RDAD</b> in $[\text{M-PF}_6]^+$ mode. ....                                                                                                                                                                                | 4  |
| <b>Figure S3.</b> Comparison of UV-Vis absorption spectra in water after in-situ oxidation using $\text{PbO}_2$ and the conversion of $[\text{Ru}(\text{bipy})_2\text{L}]^{2+}$ (black) to $[\text{Ru}(\text{bipy})_2\text{L}]^{3+}$ (red), where L represents the alizarin ligand. .... | 5  |
| <b>Figure S4.</b> Interconversion of different ruthenium alizarin isomers with different environments (top). <b>RDAD</b> in different pH solutions (bottom). ....                                                                                                                        | 6  |
| <b>Figure S5.</b> Degradation of <b>RDAD</b> with $\text{H}_2\text{O}_2$ in the aqueous buffer solution from pH 2 to pH 13. The solution was deoxygenated with $\text{N}_2$ before the measurement. ....                                                                                 | 8  |
| <b>Figure S6.</b> Concentration of <b>RDAD</b> versus time at 567 nm with $\text{H}_2\text{O}_2$ in the aqueous buffer solutions from pH 2 to pH 10. ....                                                                                                                                | 10 |
| <b>Figure S7.</b> Plot of $k_1$ versus pH for <b>RDAD</b> . ....                                                                                                                                                                                                                         | 11 |
| <b>Figure S8.</b> HPLC of $\Delta$ - <b>RDAD</b> (top) and solvent blank (bottom) measured at 250 nm. ....                                                                                                                                                                               | 12 |
| <b>Figure S9.</b> HPLC of $\Delta$ - <b>RDAD</b> (top) and solvent blank (bottom) measured at 567 nm. ....                                                                                                                                                                               | 12 |
| <b>Figure S10.</b> HPLC of $\Lambda$ - <b>RDAD</b> (top) and solvent blank (bottom) measured at 250 nm. ....                                                                                                                                                                             | 13 |
| <b>Figure S11.</b> HPLC of $\Lambda$ - <b>RDAD</b> (top) and solvent blank (bottom) measured at 567 nm. ....                                                                                                                                                                             | 13 |

**Table S1.** <sup>1</sup>H NMR chemical shifts (ppm) for Δ-RDAD in CD<sub>3</sub>CN at R.T.

| Complex | Fragment         | H <sub>2</sub> | H <sub>3</sub> | H <sub>4</sub> | H <sub>5</sub> | H <sub>6</sub> | H <sub>7</sub> | H <sub>8</sub> |
|---------|------------------|----------------|----------------|----------------|----------------|----------------|----------------|----------------|
| RDAD    | alizarin         | 7.48 s         | 6.83 d         | 7.50 d         | 8.09m          | 7.70 t         | 7.52 t         | 7.62 d         |
|         |                  |                | (7.9)          | (7.8)          |                | (7.6)          | (7.6)          | (8.0)          |
|         | bpy <sub>a</sub> | 8.44 d         | 7.89m          | 7.21 t         | 7.89m          |                |                |                |
|         |                  | (8.4)          |                | (6.7)          |                |                |                |                |
|         | bpy <sub>b</sub> | 8.52 d         | 8.09m          | 7.60 t         | 8.76 d         |                |                |                |
|         |                  | (8.1)          |                | (6.5)          | (5.6)          |                |                |                |
|         | bpy <sub>c</sub> | 8.41 d         | 7.83m          | 7.18 t         | 7.83m          |                |                |                |
|         |                  | (8.1)          |                | (6.8)          |                |                |                |                |
|         | bpy <sub>d</sub> | 8.52 d         | 8.09m          | 7.50 t         | 8.62 d         |                |                |                |
|         |                  | (8.1)          |                | (6.5)          | (5.6)          |                |                |                |

<sup>1</sup>Coupling constants (*J*) are in the brackets. Unit of *J* is Hz.

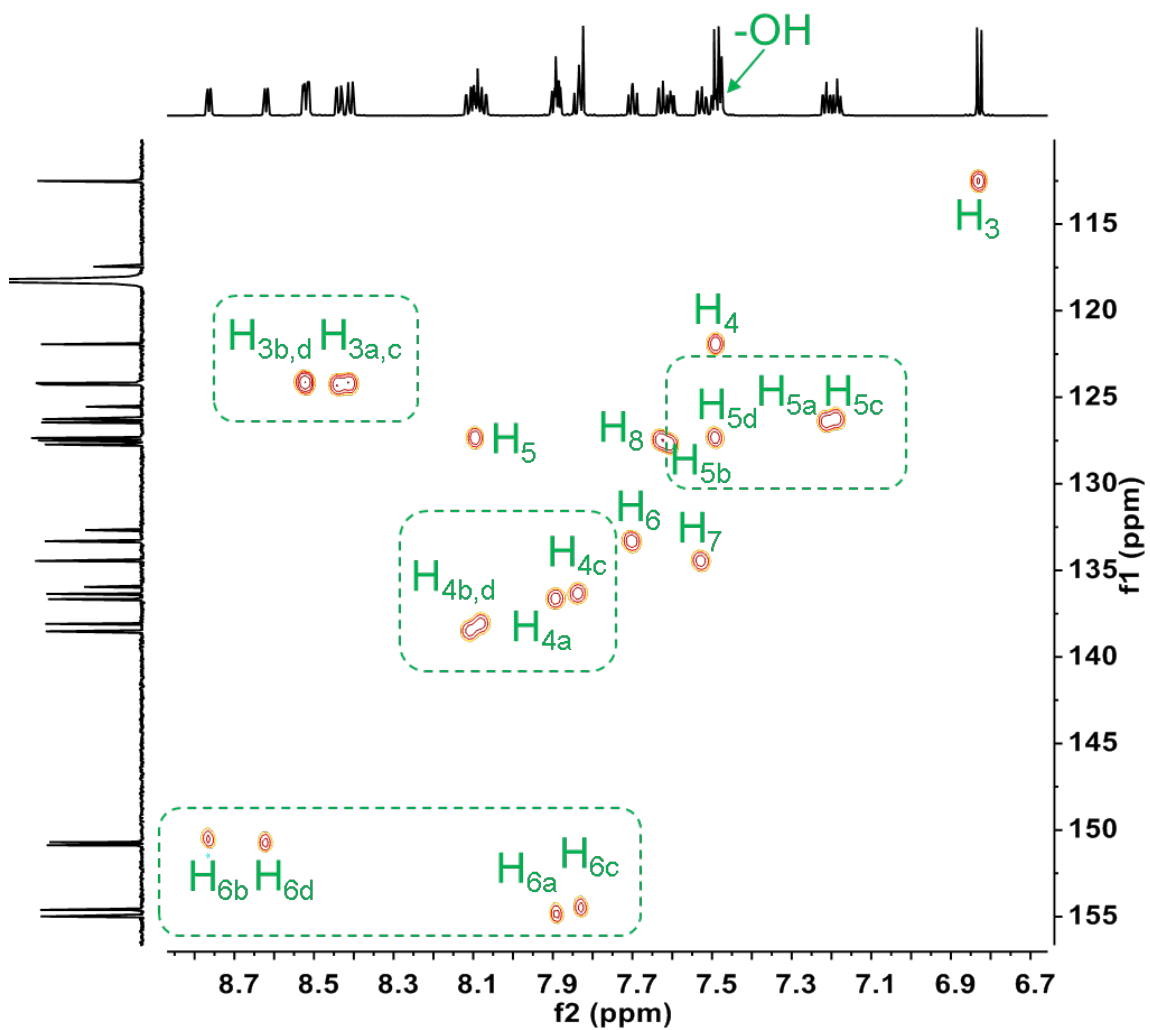

**Figure S1.** Labelled HSQC spectrum for  $\Delta$ -RDAD in CD<sub>3</sub>CN at R.T.

LZ\_L\_RU\_A  
(MeCN)/MeCN  
C34H23N4O4RuPF6  
SM: 7G

EPSRC National Facility Swansea  
LTQ Orbitrap XL

NEWBEN-LZ  
12/02/2018 12:38:46

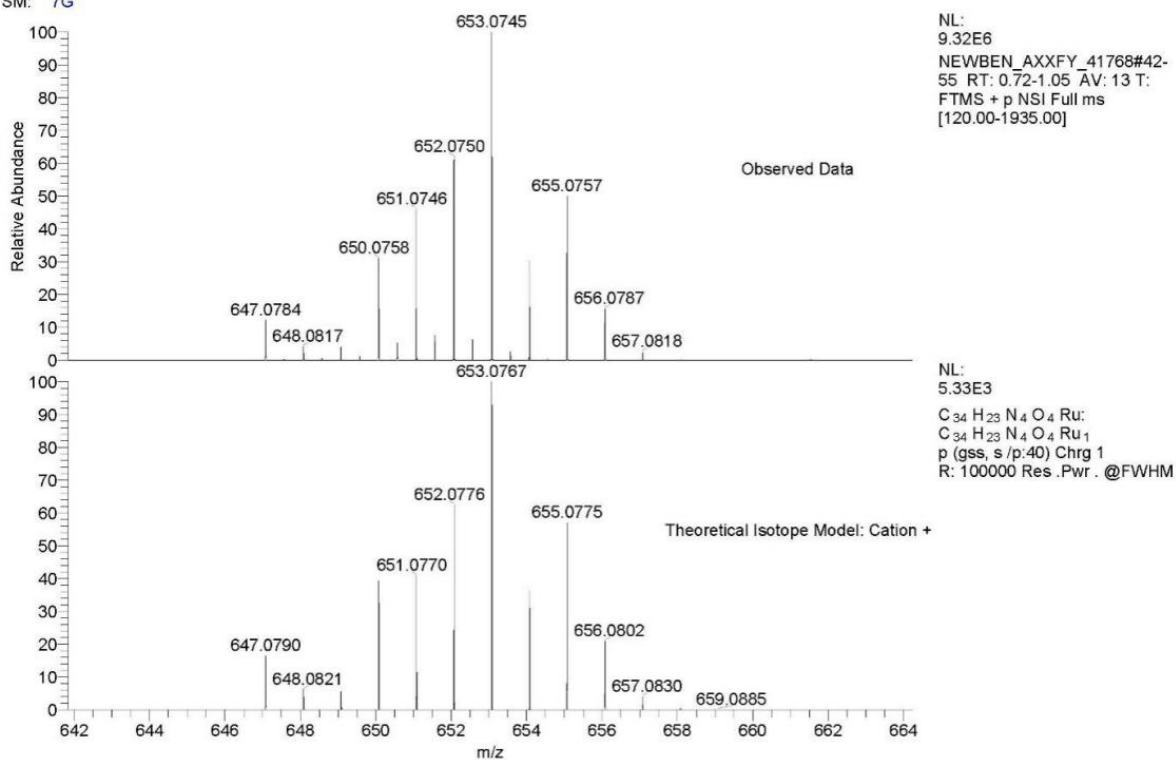

Figure S2. Observed and theoretical mass spectra for RDAD in [M-PF<sub>6</sub>]<sup>+</sup> mode.

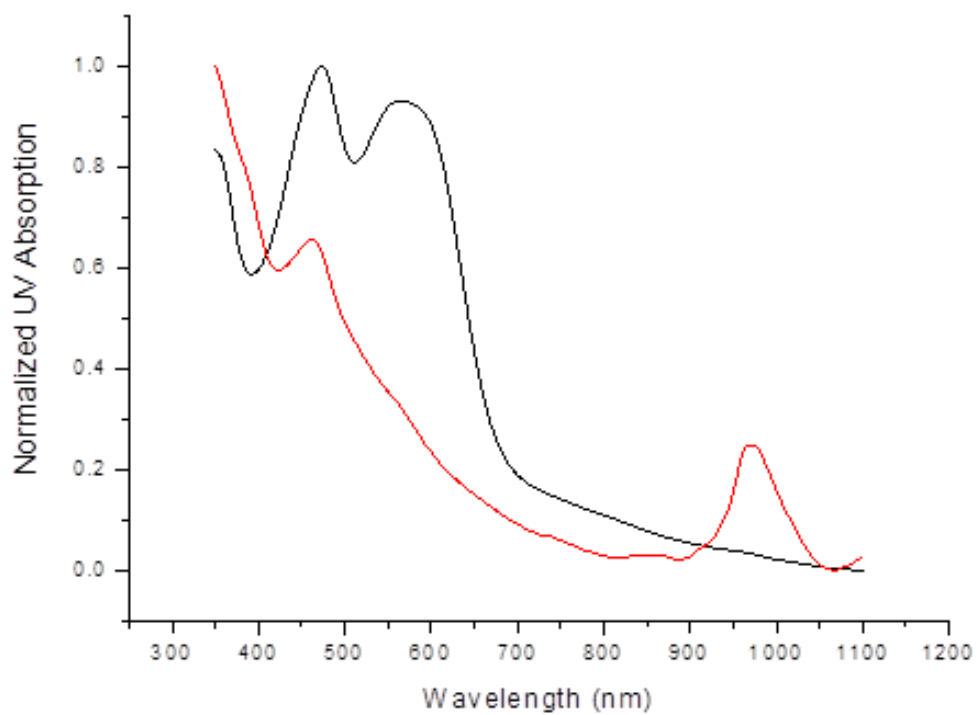

**Figure S3.** Comparison of UV-Vis absorption spectra in water after *in-situ* oxidation using  $\text{PbO}_2$  and the conversion of  $[\text{Ru}(\text{bipy})_2\text{L}]^{2+}$  (black) to  $[\text{Ru}(\text{bipy})_2\text{L}]^{3+}$  (red), where L represents the alizarin ligand.

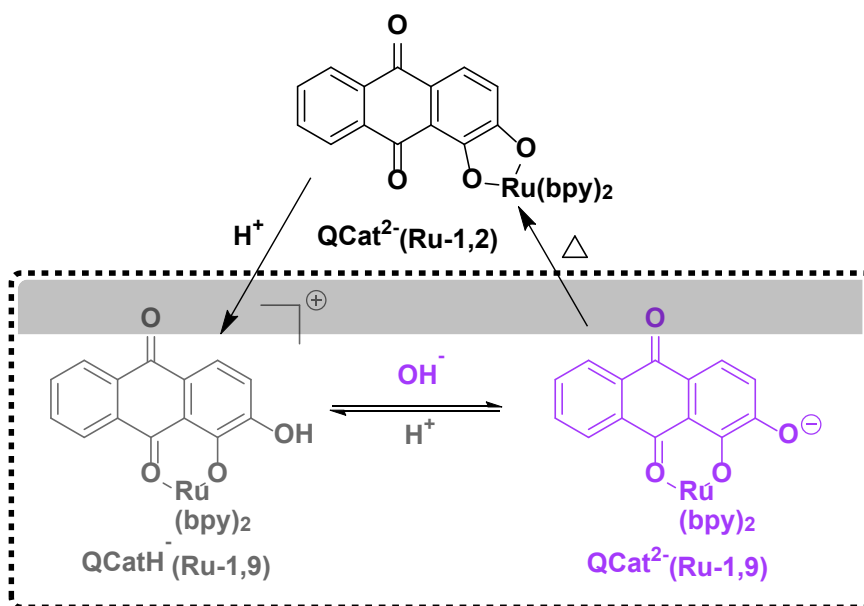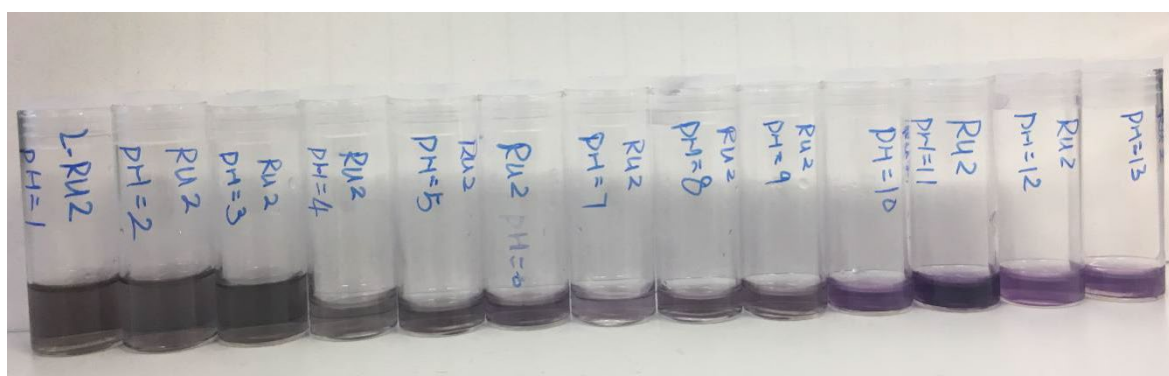

**Figure S4.** Interconversion of different ruthenium alizarin isomers with different environments (top). **RDAD** in different pH solutions (bottom).

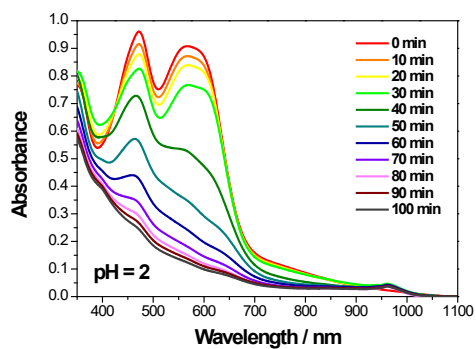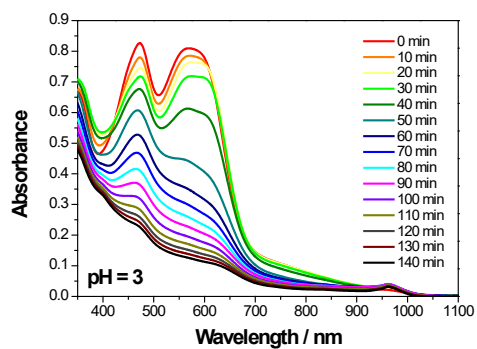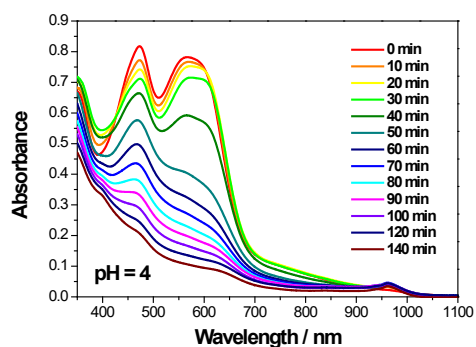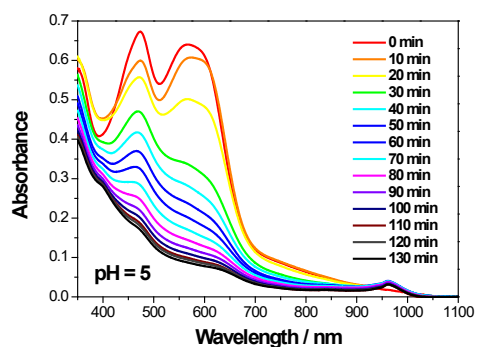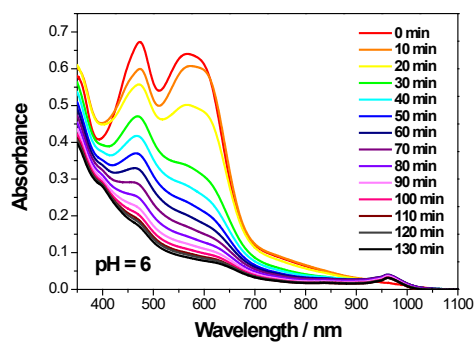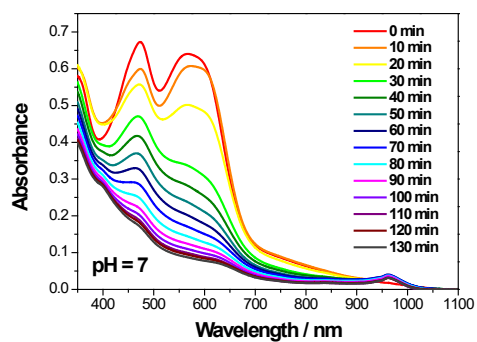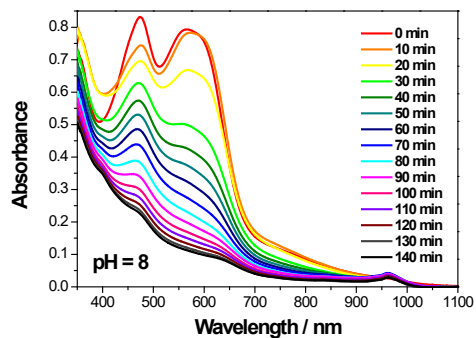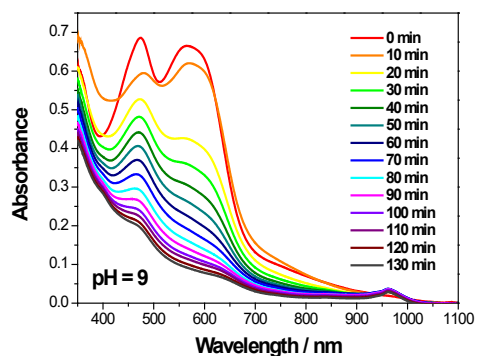

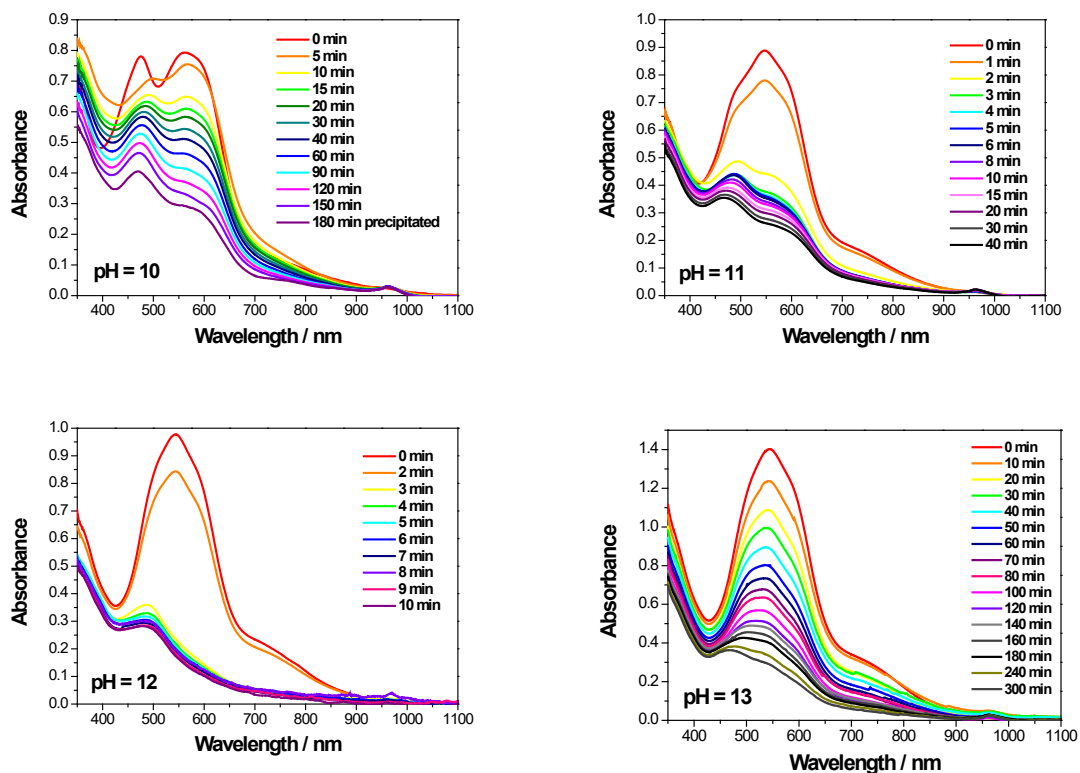

**Figure S5.** Degradation of **RDAD** with  $\text{H}_2\text{O}_2$  in the aqueous buffer solution from pH 2 to pH 13. The solution was deoxygenated with  $\text{N}_2$  before the measurement.



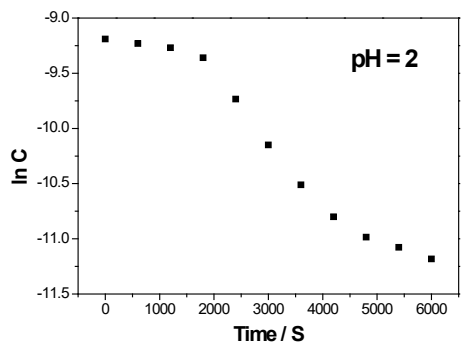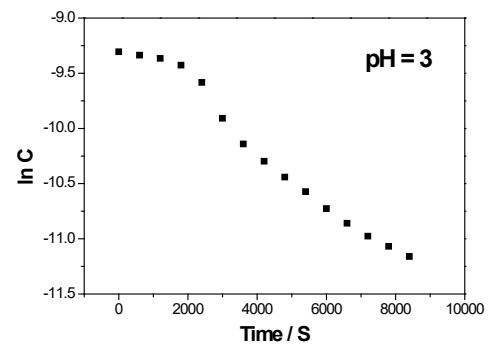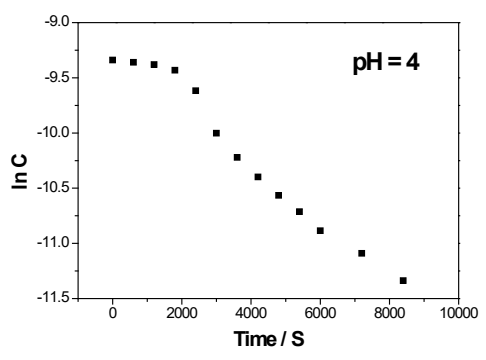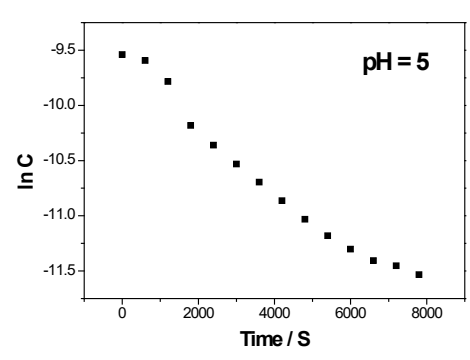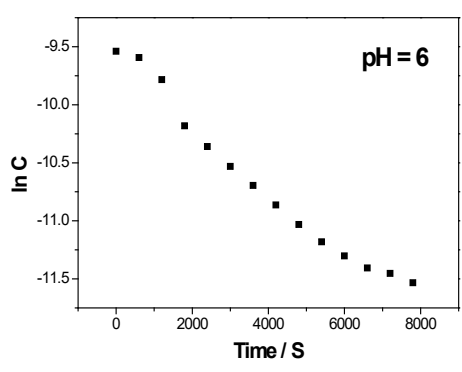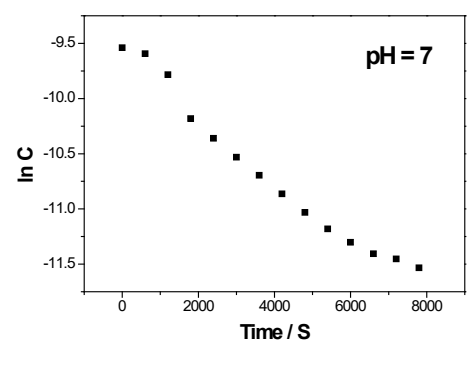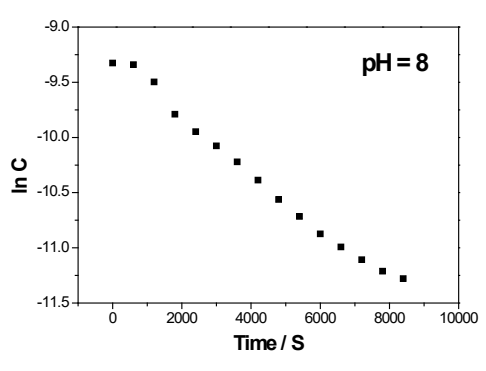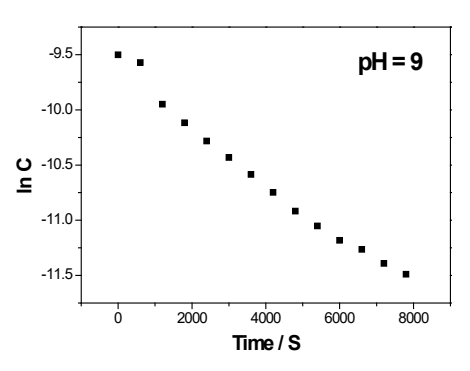

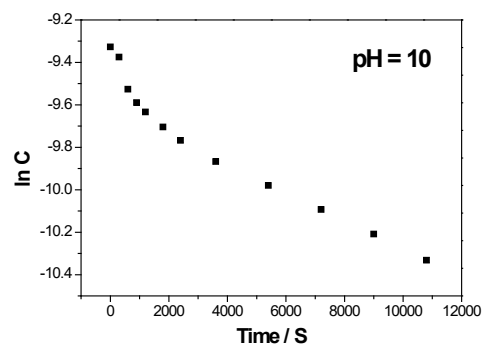

**Figure S6.** Concentration of **RDAD** versus time at 567 nm with  $\text{H}_2\text{O}_2$  in the aqueous buffer solutions from pH 2 to pH 10.

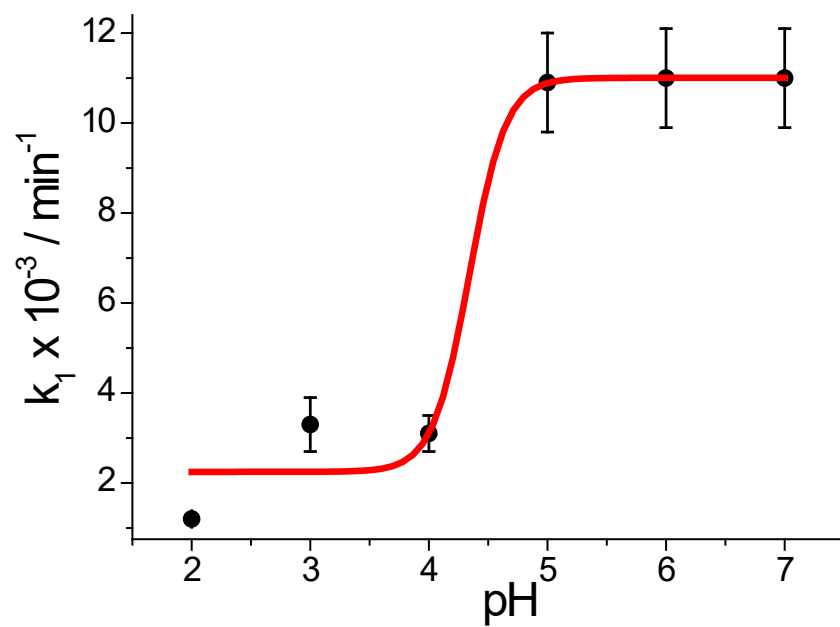

**Figure S7.** Plot of  $k_1$  versus pH for **RDAD**.

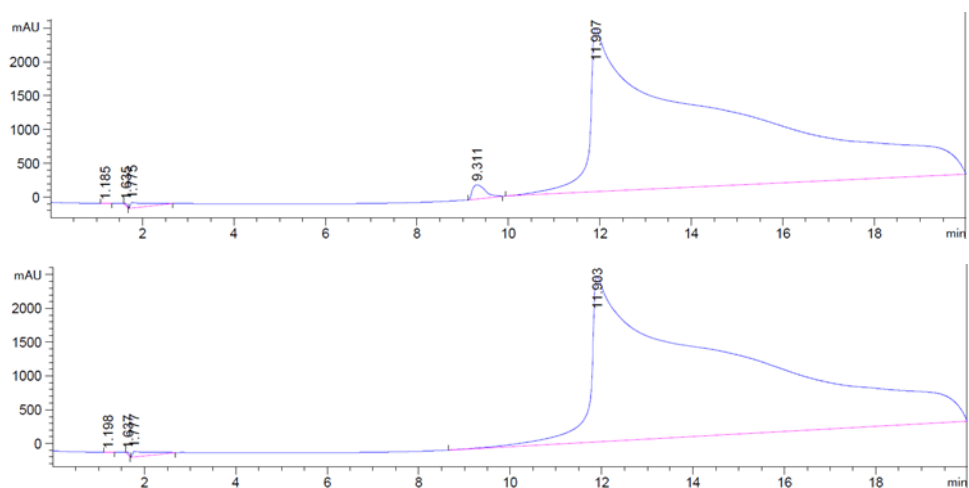

**Figure S8.** HPLC of  $\Delta$ -RDAD (top) and solvent blank (bottom) measured at 250 nm.

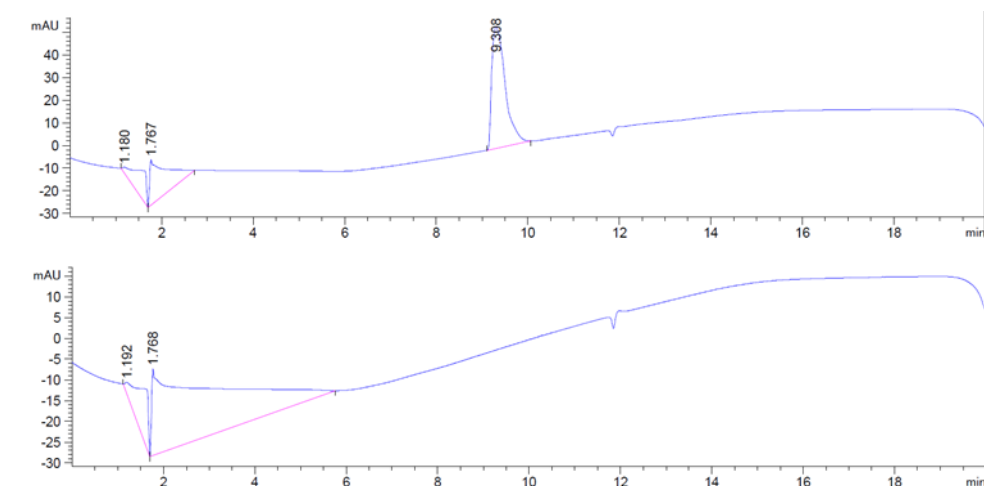

**Figure S9.** HPLC of  $\Delta$ -RDAD (top) and solvent blank (bottom) measured at 567 nm.

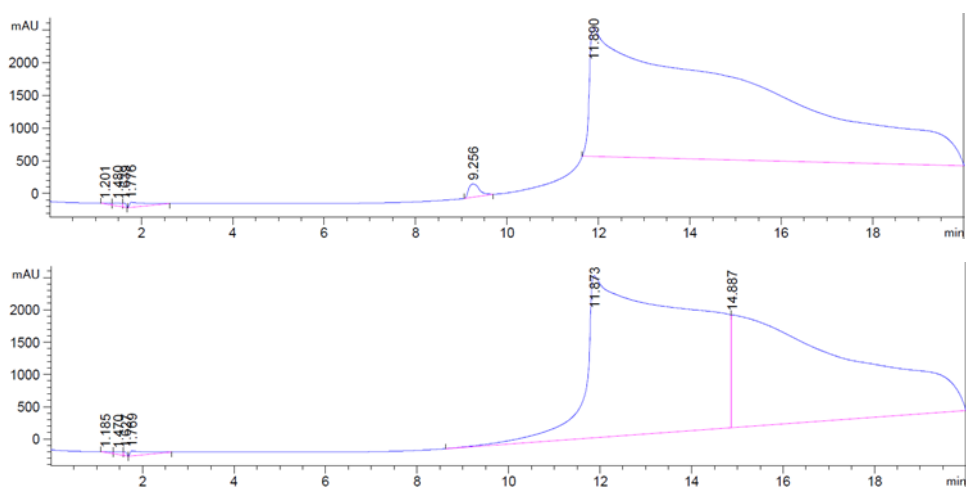

**Figure S10.** HPLC of  $\Lambda$ -RDAD (top) and solvent blank (bottom) measured at 250 nm.

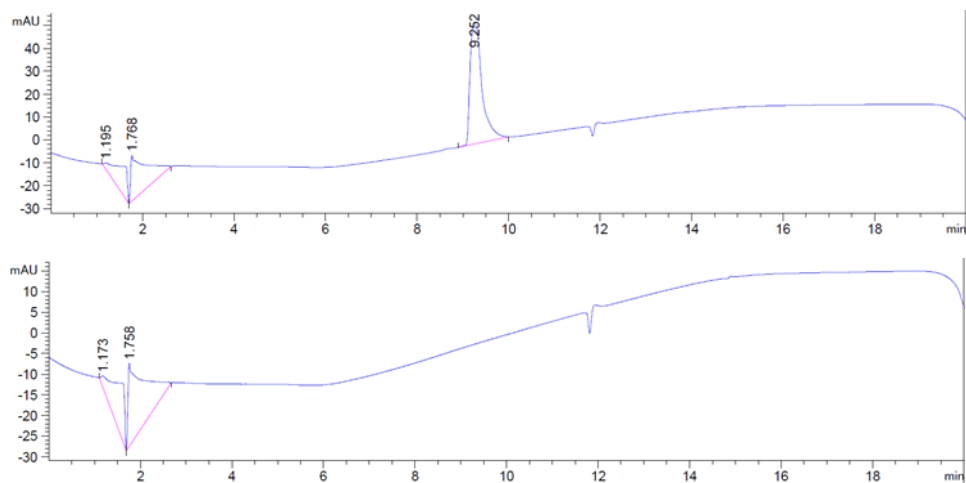

**Figure S11.** HPLC of  $\Lambda$ -RDAD (top) and solvent blank (bottom) measured at 567 nm.
